# Supplementary material for: PARM1 Drives Smooth Muscle Cell Proliferation in Pulmonary Arterial Hypertension via AKT/FOXO3A Axis
Source: MDPI journal article supplement (doi:10.3390/ijms24076385), 2023-03-28
Supplement: s1 [file s1]

A

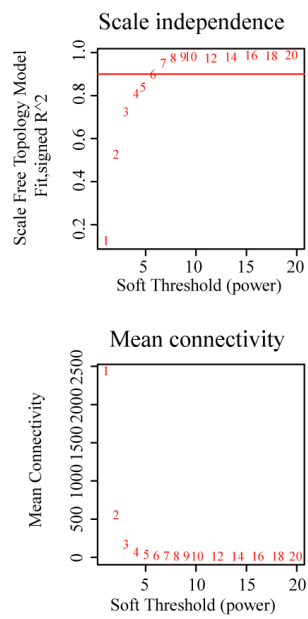

B

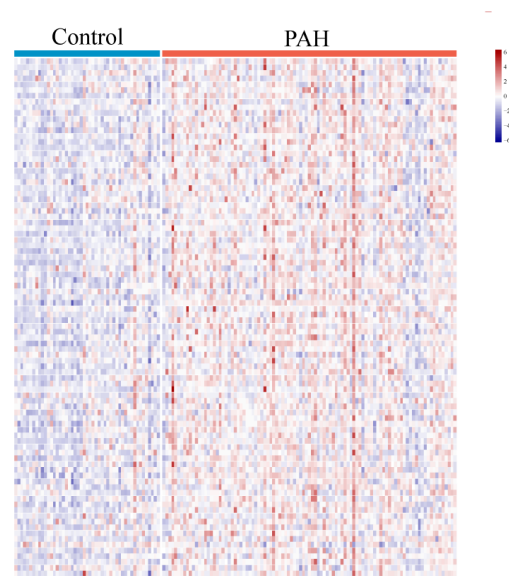

**Figure S1.** The module detection by WGCNA. (A) In the scale-free topology plot, the up panel shows the scale-free index as a function of the soft thresholding power. The down panel displays the mean connectivity as a function of the soft-thresholding power. (B) The heat map of the white gene expression between normal lungs and PAH lungs. WGCNA, weighted gene co-expression network analysis; PAH, pulmonary arterial hypertension.

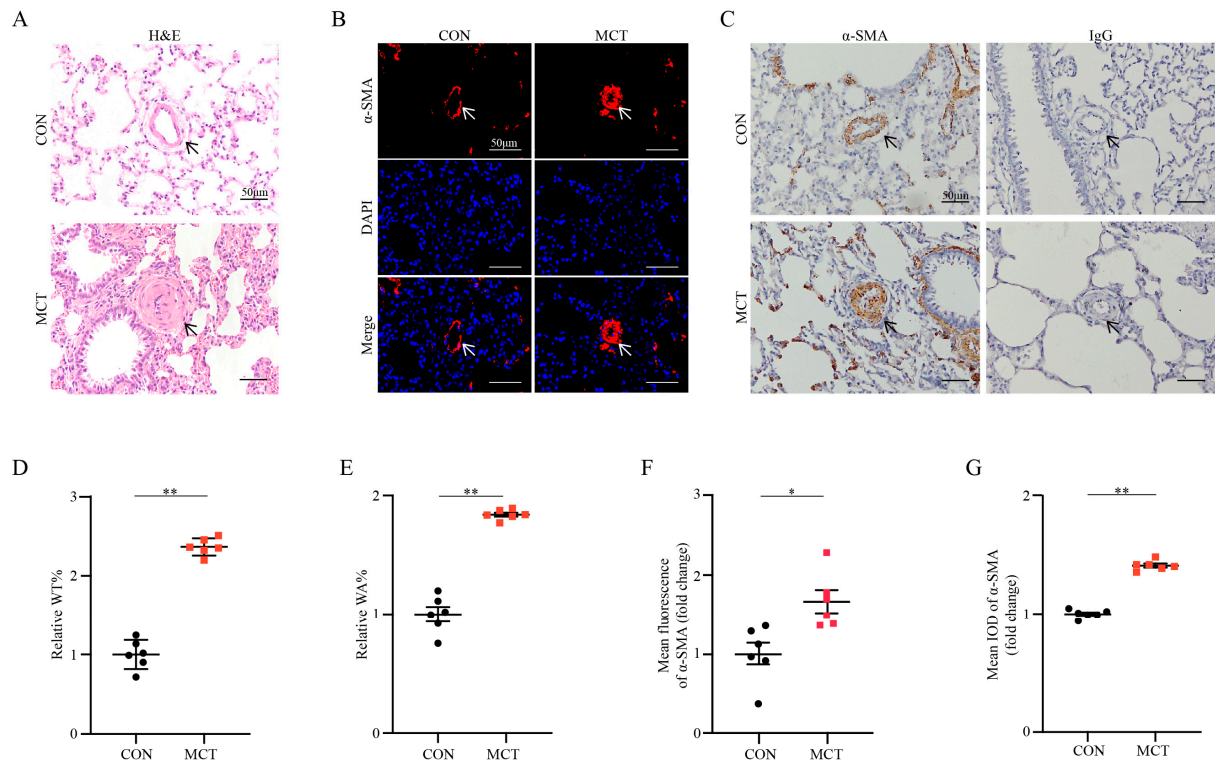

**Figure S2.** H&E staining and immunohistochemical staining of rat pulmonary artery. (A) Representative images of H&E staining in the pulmonary artery of CON and PAH rats (n=6; scale bar, 50 μm). (B) Representative images of immunofluorescence staining in the pulmonary artery of CON and PAH rats (n=6; scale bar, 50 μm). (C) Representative images of immunohistochemical staining in the pulmonary artery of CON and PAH rats (n=6; scale bar, 50 μm). (D, E) Quantitative analysis of WT% and WA% of pulmonary artery of H&E staining (n=6 each). (F) Representative immunofluorescence staining quantification of α-SMA. (G) Representative immunohistochemical quantification of α-SMA. Data are shown as mean ± SEM. \* $p < 0.05$ , \*\* $p < 0.01$  vs. CON group (student's  $t$ -test). CON, control rats without pulmonary arterial hypertension; PAH, pulmonary arterial hypertension; MCT, monocrotaline; H&E, hematoxylin eosin; WT%, (the diameter of external vessel – the diameter of internal vessel) / the diameter of external vessel × 100%; WA%, (the total area of the vessel – the lumen area of the vessel) / the total area of vessel × 100%; IOD, the integral optical density; α-SMA, α-smooth muscle actin. The black/white arrow represents pulmonary artery.

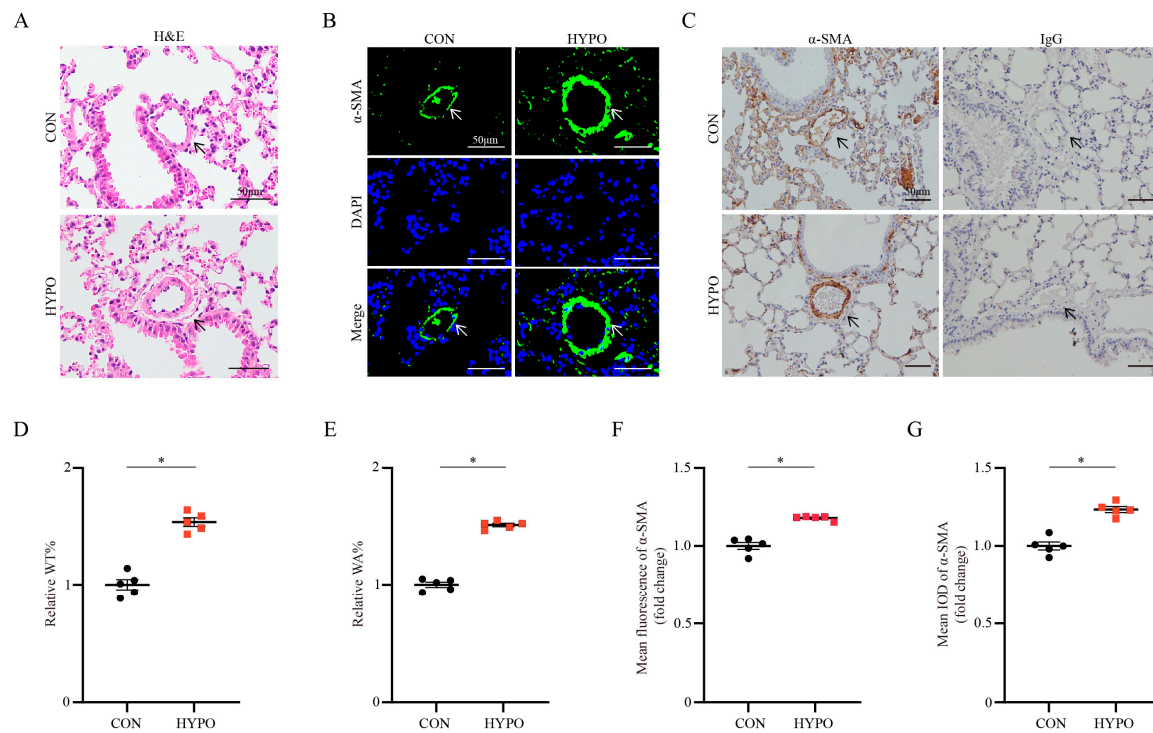

**Figure S3.** H&E staining and immunohistochemical staining of mouse pulmonary artery. (A) Representative images of H&E staining in the pulmonary artery of CON and PAH mice (n=5; scale bar, 50  $\mu$ m). (B) Representative images of immunofluorescence staining in the pulmonary artery of CON and PAH mice (n=5; scale bar, 50  $\mu$ m). (C) Representative images of immunohistochemical staining in the pulmonary artery of CON and PAH mice (n=5; scale bar, 50  $\mu$ m). (D, E) Quantitative analysis of WT% and WA% of pulmonary artery of H&E staining (n=5 each). (F) Representative immunofluorescence staining quantification of  $\alpha$ -SMA. (G) Representative immunohistochemical quantification of  $\alpha$ -SMA. Data are shown as mean  $\pm$  SEM. \* $p$  < 0.05 vs. CON group (student t-test). CON, control mice without pulmonary arterial hypertension; PAH, pulmonary arterial hypertension; HYPO, hypoxia; H&E, hematoxylin eosin; WT%, (the diameter of external vessel – the diameter of internal vessel) / the diameter of external vessel  $\times$  100%; WA%, (the total area of the vessel – the lumen area of the vessel) / the total area of vessel  $\times$  100%; IOD, the integral optical density;  $\alpha$ -SMA,  $\alpha$ -smooth muscle actin. The black/white arrow represents pulmonary artery.

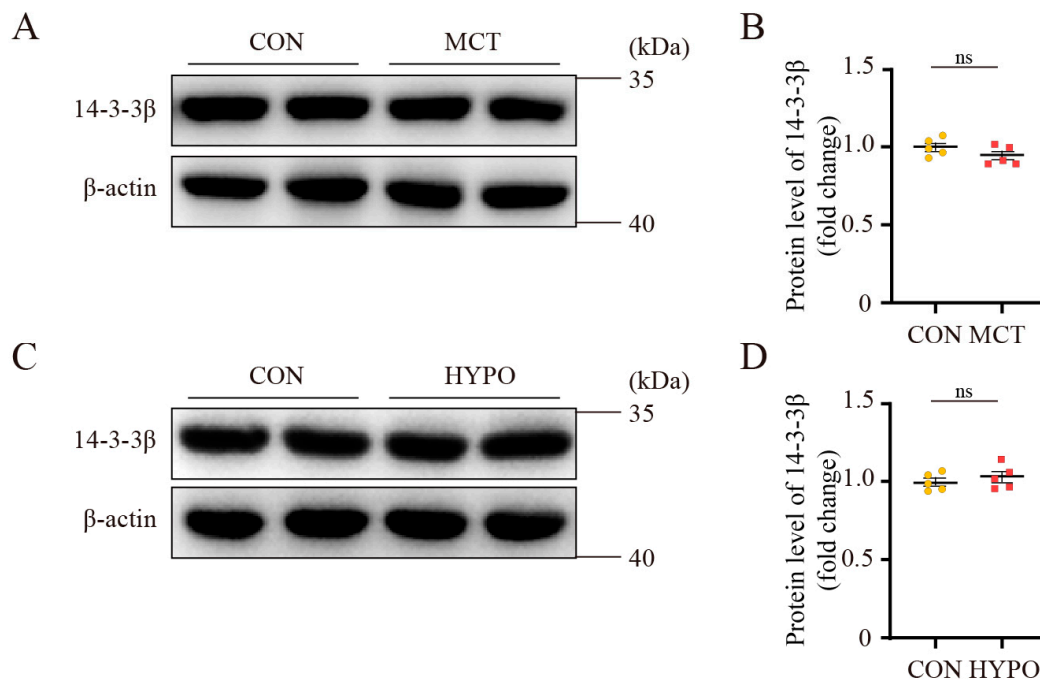

**Figure S4.** Representative Western blots and analysis of 14-3-3 $\beta$  expression in rat/mouse lung. (A, B) Representative images of Western blots of 14-3-3 $\beta$  expression in rat lung. (C, D) Representative images of Western blots of 14-3-3 $\beta$  expression in mouse lung. Equal protein loading was confirmed using an anti- $\beta$ -actin antibody (n=5 each). Data are shown as mean  $\pm$  SEM (n=5 each); ns represents statically non-significant (student's *t*-test).

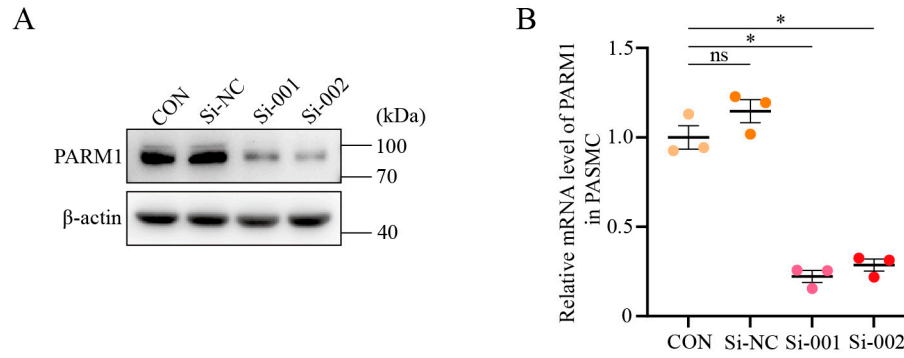

**Figure S5.** Validation of PARM1 siRNAs in PASC. Different siRNA of PARM1, Si-001 and Si-002, as well as scrambled control, Si-NC were tested in primarily isolated PASC. Representative Western blots (A) and qPCR results as summarized in a dot plot (B) showed that both siRNAs could significantly downregulate the expression of PARM1 in PASC. Data are shown as mean  $\pm$  SEM ( $n=3$ ); ns represents statically non-significant.  $*p < 0.05$  vs. CON group (student's  $t$ -test).
